# Supplementary material
Source: Elsevier journal article supplement (https://git.physik.uzh.ch/gitbucket/mchrzasz/Lecture_repo/raw/c1a7c18fd5d8300517243736688a7c6328fd23ea/Lectures_others/MC/W_Placzek_2010/mmc03.pdf)
Supplement: mmc03 [file mmc03.pdf]

# Adaptacyjne techniki całkowania Monte Carlo

- Wady klasycznych metod MC redukcji wariancji.
- Typowy schemat adaptacyjnego algorytmu Monte Carlo.
- Przykłady adaptacyjnych algorytmów Monte Carlo:
  - ▷ Program RIWIAD Sheppeya i Lautrupa.
  - ▷ Adaptacyjny algorytm średniej ważonej Friedmana.
  - ▷ Program DIVONNE2 Friedmana.
  - ▷ Program VEGAS Lepage'a.
  - ▷ Program FOAM Jadacha.
- Metody całkowania Monte Carlo a kwadratury numeryczne.

⇒ <http://th-www.if.uj.edu.pl/~placzek/dydaktyka/MMC/>

- Wszystkie przedstawione klasyczne metody redukcji wariancji, z wyjątkiem równomiernego losowania warstwowego, **wymagają** pewnej **uprzedniej znajomości funkcji**.
  - Kiedy metody te zostaną **niewłaściwie zastosowane** mogą łatwo prowadzić do **degradacji efektywności** rachunku Monte Carlo zamiast do jego poprawy!
  - Potrzebny jest dodatkowy nakład pracy związany z zastosowaniem danej metody redukcji wariancji do każdej całkowanej funkcji.
- ▶ Naturalne rozszerzenie metod redukcji wariancji idzie w kierunku **technik adaptacyjnych**, czyli takich, które „**poznają**” **funkcję w trakcie wykonywania rachunku** (najlepiej nie wymagając żadnej znajomości funkcji *a priori*) i odpowiednio dobierają metodę liczenia całki.
- ▷ Podobnie inspirowane techniki znajdują szerokie zastosowanie przy obliczaniu całek przy użyciu kwadratur numerycznych.
- ▷ Prawdziwie adaptacyjne metody dla całkowania Monte Carlo są mniej powszechne, ponieważ są dość trudne do zrealizowania – najczęściej występują w postaci gotowych **programów komputerowych** (poznamy kilka przykładów).
- **Integrator MC** – program przeznaczony tylko do całkowania funkcji.
- **Generator MC** – program, który, oprócz całkowania, może wydajnie generować przypadki (punkty losowe) według rozkładów danych przez całkowane funkcje.

## Podział na dwie fazy:

### 1. **Faza eksploracyjna** – „poznawanie” funkcji.

- ▶ Najczęściej rekursywny podział obszaru całkowania na warstwy (stratyfikacja), tak aby całki w poszczególnych warstwach były w przybliżeniu jednakowe, a funkcja w obrębie warstwy była jak najbliższa stałej (**niełatwe zadanie!**) – do oszacowania całek w warstwach używa się albo prostej metody kwadraturowej, albo metody podstawowej Monte Carlo.
- ▶ Czasami funkcję podcałkową aproksymuje się pewną kombinacją wybranych funkcji elementarnych.

### 2. **Faza obliczeniowa** – obliczanie wartości całki i jej błędu statystycznego.

- ▶ Obliczana jest całka metodą **losowania warstwowego** lub metodą **średniej ważonej** – zależnie od fazy eksploracyjnej.
- ▶ Czasami istnieje możliwość generowania punktów według rozkładu danego przez funkcję podcałkową.

▷ Czasem faza obliczeniowa połączona jest z fazą eksploracyjną i dla każdego podziału na warstwy obliczana jest całka, a następnie konstruowana jest tzw. **biegnąca średnia ważona** estymatora całki oraz jej błędu – procedura jest **zatrzymywana** po osiągnięciu **żądaney dokładności**.

→ Może być obciążona błędami systematycznymi z wczesnych etapów rachunowych, od których **nie potrafi się uwolnić!** (np. funkcja z wąskim pikiem „nieodkrytym” na wczesnych etapach)

- ▶ **Program RIWIAD Sheppeya i Lautrepa (ok. 1970)** : jeden z najwcześniejszych adaptacyjnych integratorów MC – używany do całkowania funkcji wielowymiarowych na hiperkostce  $(0, 1)^n$ .
- ▷ **Schemat działania:**
  - Na początku dzieli hiperkostkę na jednakowe hiperkostki i w każdej z nich oszacowuje całkę metodą podstawową MC (jednorodna stratyfikacja).
  - W oparciu o wartości całek w podobszarach przesuwa ich granice tak, że objętości nowopowstałych hiperprostokątów są mniejsze tam, gdzie funkcja jest większa i odwrotnie.
  - Powyższy proces jest kontynuowany i w każdym kroku obliczany jest estymator całki oraz jego wariancja – z nich konstruowana jest **biegnąca średnia ważona** estymatora całki funkcji oraz jego odchylenia standardowego.
  - Procedura jest zatrzymywana po osiągnięciu wymaganej dokładności.
- ▷ **Wady:**
  - \* Granice hiperprostokątów są zawsze **równoległe** do pierwotnych osi parametrów i zawsze biegą wzdłuż **całej długości hiperkostki**, nawet jeśli poprzednie wyniki wskazywały, że pewne hiperprostokąty nie musiałyby być dzielone.
  - \* Ważona średnia cząstkowych wyników może być obarczona **błędami systematycznymi** spowodowanymi **korelacjami** między estymatorami **wartości oczekiwanej** oraz **wariancji** – program nigdy nie wyzwala się z przypadkowo złych oszacowań w poprzednich krokach.

▶ **Program J. Friedmana (lata 1970-te) (nieopublikowany):** przykład adaptacyjnego algorytmu MC korzystającego z metody średniej ważonej.

▷ **Schemat działania:**

1. Faza eksploracyjna

Konstruowana jest **funkcja próbna** jako kombinacja liniowa funkcji Cauchy'ego (Breita–Wignera), w której pozycje i kształty pików odpowiadają odpowiednim pikom funkcji całkowanej. Do skonstruowania funkcji próbnej używana jest procedura minimalizacji funkcji oraz analiza wektorów własnych kowariancji funkcji wokół każdego pików.

▷ Funkcja Cauchy'ego jest używana dlatego, że dąży do zera wolniej niż funkcja Gaussa, pozwalając unikać niestabilności.

2. Faza obliczeniowa

Obliczana jest wartość całki i jej błąd statystyczny przy użyciu metody **średniej ważonej**, w oparciu o **funkcję próbną** skonstruowaną w **fazie eksploracyjnej**.

▷ Wady:

Nie nadaje się dla funkcji, które nie mogą być aproksymowane niewielką liczbą pików Cauchy'ego – niemało jest takich funkcji w praktyce!

► Program DIVONNE2, J. Friedman, **SLAC CGTM No. 188 (1977)**: adaptacyjny algorytm MC oparty o rekursywny podział obszaru całkowania (dostępny w bibliotece CERNLIB).

▷ Schemat działania:

1. Faza eksploracyjna

Wykonywanie rekursywnego podziału wielowymiarowego obszaru całkowania (stratyfikacja), tak aby o trzymać podobszary, w których zakres wartości całkowanej funkcji jest jak najmniejszy. W tym celu używane są techniki minimalizacji funkcji.

2. Faza obliczeniowa

Obliczanie wartości całki i jej błędu statystycznego w oparciu o metodę **losowania warstwowego**.

▷ Istnieje także możliwość generowania punktów losowych według wielowymiarowego rozkładu danego przez funkcję podcałkową.

▷ Wady:

Granice podziałów są równoległe do osi parametrów funkcji, podobnie jak w RIWIADzie.

→ Ale ponieważ podział jest rekursywny (tylko jeden podobszary jest dzielony w każdym kroku, a nie cały rząd), to algorytm wykazuje tendencję do uwalniania się od orientacji osi.

- Program VEGAS, J. G. P. Lepage, *J. Comp. Phys.* **27** (1978) 192: adaptacyjny algorytm MC oparty o iteracyjny podział obszaru całkowania (podobny do RIWIADA).

### Algorytm jednowymiarowy

▷ Niech:  $I = \int_0^1 f(x)dx$ .

1. Generujemy  $M$  losowych punktów  $x_i \in \mathcal{U}(0, 1)$ , tzn. z jednorodną gęstością prawdopodobieństwa  $p(x) = 1$ , i obliczamy w nich wartości funkcji:  $f(x_i)$ . Obliczamy całkę i jej błąd metodą podstawową MC.
2. Przedział całkowania dzielimy na  $N$  równych przedziałów:

$$0 = x_0 < x_1 < \dots < x_N = 1, \quad \Delta x_i = x_i - x_{i-1}.$$

Następnie każdy z przedziałów  $\Delta x_i$  dzielimy na  $(m_i + 1)$  podprzedziałów, gdzie:

$$m_i = K \frac{\bar{f}_i \Delta x_i}{\sum_j \bar{f}_j \Delta x_j}, \quad K = \text{const. (typowo} = 1000),$$

a

$$\bar{f}_i \equiv \sum_{x \in [x_{i-1}, x_i)} |f(x)| \sim \frac{1}{\Delta x_i} \int_{x_{i-1}}^{x_i} |f(x)| dx.$$

⇒ Nowy podział będzie gęstszy tam gdzie funkcja  $|f(x)|$  jest „większa”, a rzadszy tam, gdzie  $|f(x)|$  jest „mniejsza”.

3. Przywracamy początkową liczbę  $N$  podziałów przez sklejanie jednakowych ilości kolejnych podprzedziałów w większe przedziały.

⇒ Nowe przedziały będą **węższe** tam gdzie funkcja  $|f(x)|$  jest **większa** i odwrotnie.

Generujemy  $M$  punktów według schodkowej gęstości prawdopodobieństwa:

$$p(x) = \frac{1}{N\Delta x_i}, \quad x_{i-1} \leq x < x_i, \quad i = 1, \dots, N,$$

i obliczamy całkę oraz jej błąd metodą średniej ważonej.

4. Powtarzamy powyższe iteracje do momentu, aż znajdziemy optymalny podział, tzn.

$$m_i \approx m_j, \quad i, j = 1, \dots, N.$$

Po każdej iteracji obliczamy biegnącą średnią ważoną:

$$\sum_k \frac{I_k}{\sigma_k^2},$$

gdzie  $I_k, \sigma_k$  – estymator całki i jego odchylenie standardowe w  $k$ -tej iteracji.

5. Po zakończeniu wszystkich iteracji obliczamy całkę i jej błąd statystyczny według wzorów:

$$\bar{I} = \sigma_{\bar{I}}^2 \sum_k \frac{I_k}{\sigma_k^2}, \quad \sigma_{\bar{I}} = \left[ \sum_k \frac{1}{\sigma_k^2} \right]^{-\frac{1}{2}}.$$



► Dalsze praktyczne ulepszenia:

- Aby uniknąć szybkich, destabilizujących zmian podziału od iteracji do iteracji, liczba podziałów każdego przedziału dobierana jest według:

$$m_i = K \left\{ \left[ \frac{\bar{f}_i \Delta x_i}{\sum_j \bar{f}_j \Delta x_j} - 1 \right] \frac{1}{\log[\bar{f}_i \Delta x_i / \sum_j \bar{f}_j \Delta x_j]} \right\}^\alpha,$$

gdzie  $\alpha$  determinuje stopień zbieżności i typowo jest ustawiane między 1 a 2.

- Kiedy funkcja ma wąskie piki,  $I_k$  oraz  $\sigma_k$  mogą być źle oszacowane we wczesnych iteracjach, co może dawać błędy systematyczne ostatecznego wyniku. Aby to poprawić, poprzedni estymator całki zastępowany jest następującym:

$$\bar{I} = \left[ \sum_k \frac{I_k^2}{\sigma_k^2} \right]^{-1} \sum_k I_k \left( \frac{I_k}{\sigma_k} \right), \quad \sigma_{\bar{I}} = \bar{I} \left[ \sum_k \frac{I_k^2}{\sigma_k^2} \right]^{-\frac{1}{2}}.$$

- Liczba iteracji (minus jeden) nie powinna być znacznie mniejsza od (odpowiednio):

$$\chi^2 \simeq \sum_k \frac{(I_k - \bar{I})^2}{\sigma_k^2} \quad \text{lub} \quad \sum_k \frac{(I_k - \bar{I})^2}{\bar{I}^2} \frac{I_k^2}{\sigma_k^2}.$$

Jeżeli tak jest, to algorytmowi nie można ufać!

⇒ Ćw. A2\*: Pokazać, że powyższe estymatory  $\bar{I}$  są nieobciążone, a ich wariancje wynoszą  $\sigma_{\bar{I}}^2$ .

## Algorytm wielowymiarowy

▷ Weźmy dla ilustracji:  $I = \int_0^1 dx \int_0^1 dy f(x, y)$ .

Próbna gęstość prawdopodobieństwa jest brana w postaci:

$$p(x, y) = p_x(x) p_y(y).$$

- Można pokazać (np. posługując się metodami analizy funkcjonalnej i używając mnożników Lagrange'a), że optymalne gęstości prawdopodobieństwa mają postać:

$$p_x(x) = \frac{\sqrt{\int_0^1 dy \frac{f^2(x, y)}{p_y(y)}}}{\int_0^1 dx \sqrt{\int_0^1 dy \frac{f^2(x, y)}{p_y(y)}}},$$

wzór na  $p_y(y)$  ma analogiczną postać.

- Zatem algorytm jednowymiarowy może być zastosowany wzdłuż każdej osi, z  $\bar{f}_i$  zdefiniowaną dla osi  $x$  jako:

$$(\bar{f}_i)^2 = \sum_{x \in [x_{i-1}, x_i)} \sum_y \frac{f^2(x, y)}{p_y^2(y)} \sim \frac{1}{\Delta x_i} \int_{x_{i-1}}^{x_i} dx \int_0^1 dy \frac{f^2(x, y)}{p_y(y)}$$

i analogicznie dla osi  $y$ .

## Przykład zastosowania

► Sferycznie symetryczna funkcja Gaussa:

$$I_n = \left( \frac{1}{a \sqrt{\pi}} \right)^n \int_0^1 d^n x \exp \left[ - \sum_{i=1}^n \frac{(x_i - 0.5)^2}{a^2} \right] = 1,$$

gdzie  $n = 9$ ,  $a = 0.1$ , a stopień zbieżności  $\alpha = 1$ .

## VEGAS

| Iteracja             | $I_k$ | $\sigma_k$ | $\bar{I}$ | $\sigma(\bar{I})$ | Liczba obliczeń funkcji |
|----------------------|-------|------------|-----------|-------------------|-------------------------|
| 1                    | 0.007 | 0.005      | 0.007     | 0.005             | $10^4$                  |
| 3                    | 0.643 | 0.070      | 0.612     | 0.064             | $3 \cdot 10^4$          |
| 5                    | 1.009 | 0.041      | 0.963     | 0.034             | $5 \cdot 10^4$          |
| 10                   | 1.003 | 0.008      | 1.001     | 0.005             | $10^5$                  |
| Metoda podstawowa MC |       |            | 0.843     | 0.360             | $10^5$                  |

## Porównanie z kwadraturami numerycznymi

► Sferycznie symetryczna funkcja Gaussa:

$$I_n = \left( \frac{1}{a \sqrt{\pi}} \right)^n \int_0^1 d^n x \exp \left[ - \sum_{i=1}^n \frac{(x_i - 0.5)^2}{a^2} \right] = 1,$$

gdzie  $n = 9$ ,  $a = 0.1$ .

### Numeryczne kwadratury Gaussa–Legendre’a

| Liczba punktów na oś | Wartość całki | Liczba obliczeń funkcji |
|----------------------|---------------|-------------------------|
| 5                    | 71.364        | $2 \cdot 10^6$          |
| 6                    | 0.017         | $10^7$                  |
| 10                   | 0.774         | $10^9$                  |
| 15                   | 1.002         | $3.8 \cdot 10^9$        |

► **Wady algorytmu VEGAS:**

- Podział obszaru całkowania odbywa się wzdłuż osi parametrów, co zakłada przybliżoną faktoryzację funkcji całkowanej na funkcje jednowymiarowe – dla niektórych funkcji wielowymiarowych może to nie być dobre przybliżenie!
- Nie radzi sobie z funkcjami, które mają piki lub krawędzie ukośnie do osi parametrów.
- Ponieważ jest optymalizowany na minimum wariancji estymatora całki, więc nie jest zbyt wydajny do generowania punktów losowych według rozkładu danego przez całkowaną funkcję (długie ogony wagi), czyli jest raczej **integratorem** niż generatorem MC.

► **Dalsze udoskonalenia algorytmu VEGAS:**

▷ S. Kawabata, *Comput. Phys. Commun.* **88** (1995) 309:

Możliwość wyodrębnienia podzbioru zmiennych, dla których funkcja jest silnie zmienna i „wyśredniowania” po pozostałych „łagodnych” zmiennych → użyteczne dla bardzo dużej liczby wymiarów  $\sim 100$ .

▷ T. Ohl, *Comput. Phys. Commun.* **120** (1999) 13:

Zamiast przybliżać funkcję podcałkową iloczynem  $n$  funkcji, można przybliżać ją sumą takich iloczynów z automatycznym dopasowaniem względnych wkładów poszczególnych składników.

⇒ **Ćw. N1\*** (nadobowiązkowe):

Zaimplementować algorytm VEGAS i zastosować go do obliczenia całek  $\Phi$  i  $\Psi$  z wykładu 2.

Porównać efektywność tego algorytmu oraz klasycznych metod całkowania Monte Carlo.

- ▶ **Program FOAM**, S. Jadach, Comp. Phys. Commun. **130** (2000) 244, arXiv:physics/9910004; Comp. Phys. Commun. **152** (2003) 55; arXiv:physics/0203033: **adaptacyjny generator MC oparty o rekursywny podział obszaru całkowania na komórki.**
- ▷ **Dwa algorytmy** podziału obszaru całkowania na komórki:
  - **Symplektyczny:** Komórki w postaci **sympleksów** (hipertrójkątów) – ograniczony do niezbyt dużej liczby wymiarów ( $\leq 5$ ).
  - **Kubiczny:** Komórki w postaci **hiperprostokątów** – może być stosowany do większej liczby wymiarów ( $\leq 20$ ).
- ▶ **Schemat** → **dwie fazy:**
  1. **Faza eksploracyjna:**

Obszar całkowania w postaci **wielowymiarowej kostki** dzielony jest **rekursywnie na komórki** – w **każdym kroku tylko jedna komórka jest dzielona na dwie niekoniecznie jednakowe części.**

Podział jest **zatrzymywany** po osiągnięciu ustalonej z góry **maksymalnej liczby komórek.**

Konstruowana jest **funkcja aproksymująca** i obliczana jest **przybliżona wartość całki.**
  2. **Faza generacji/obliczeń:**

**Generowane są punkty losowe** według rozkładu danego przez **wielowymiarową funkcję** i **obliczana jest** odpowiednia **całka** metodą **średniej ważonej**, w oparciu o funkcję aproksymującą i jej całkę wyznaczoną w **fazie eksploracyjnej.**

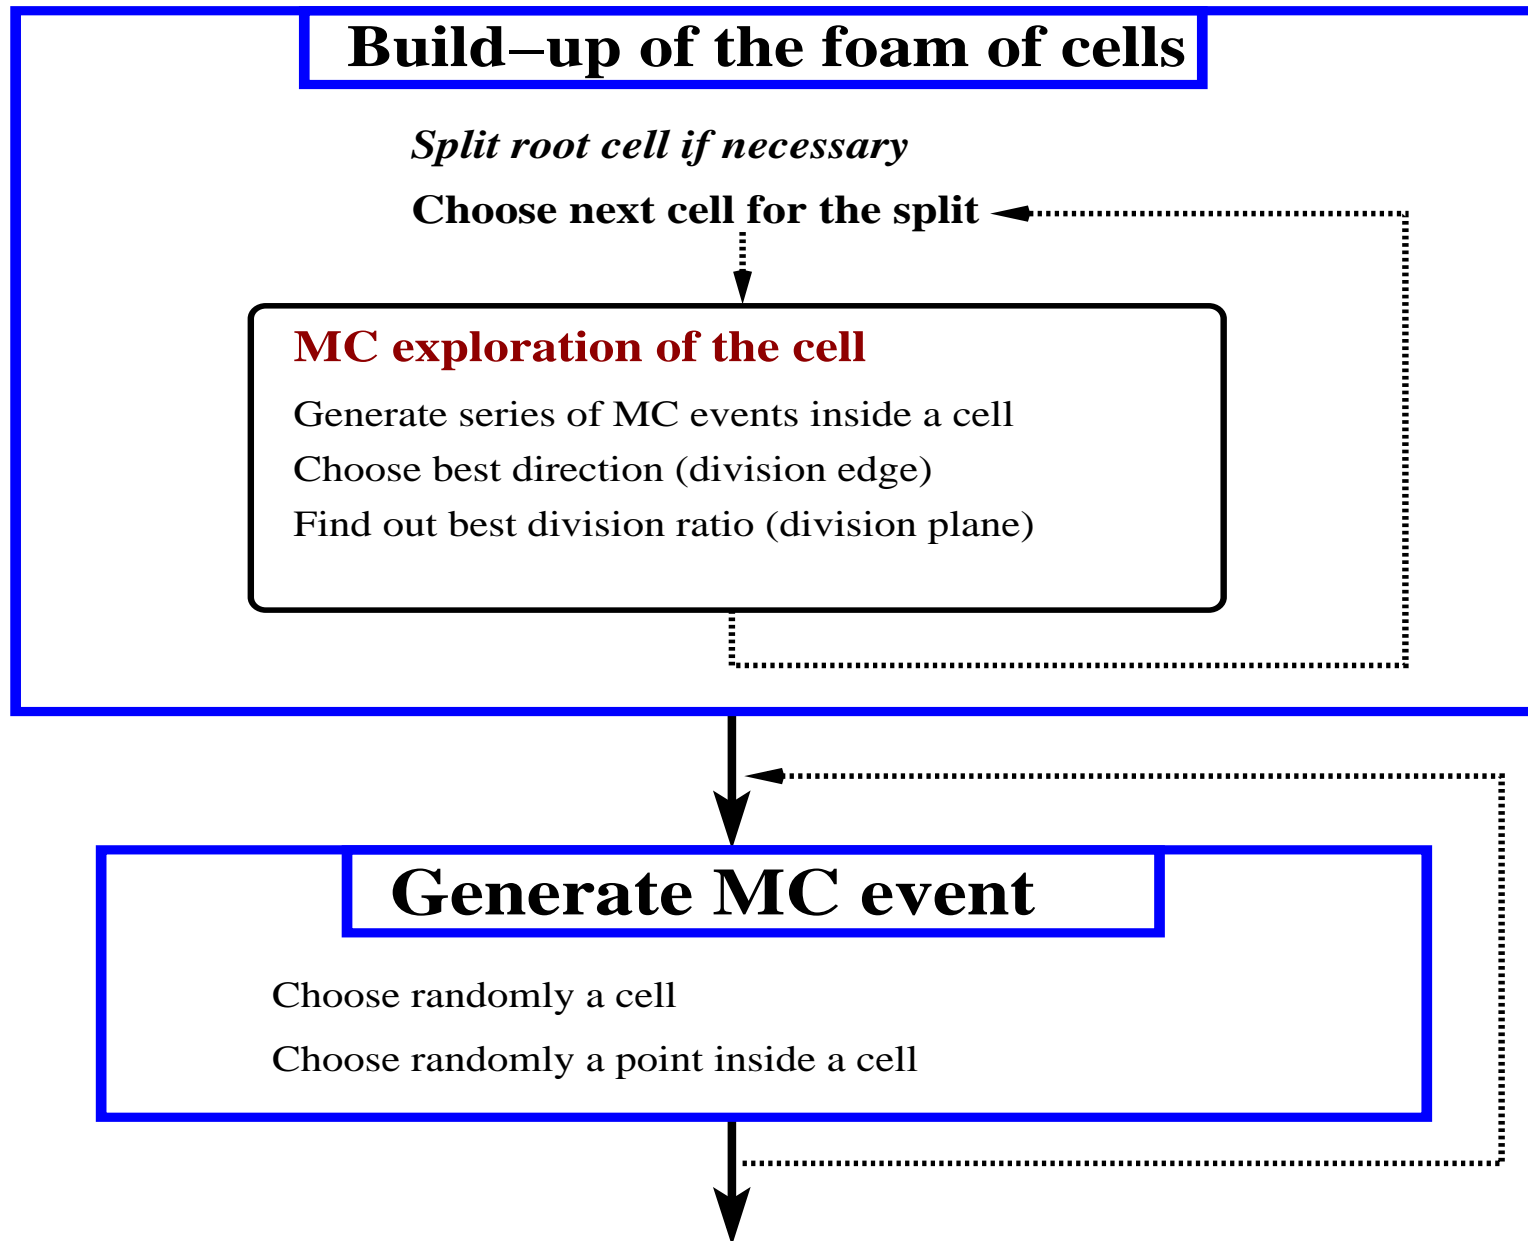

## Cechy algorytmu FOAM

- Możliwe dwa kryteria podziału komórek:
  - (1) Optymalizacja wariancji estymatora całki – optymalne do całkowania.
  - (2) Optymalizacja wagi maksymalnej – optymalne do generowania przypadków nieważonych.
- Możliwość generowania zmiennych dyskretnych.
- Możliwość wyłączenia podziału komórek w wybranych kierunkach (dla których funkcja jest prawie stała).
- Możliwość predefiniowania punktów podziału – dla wąskich pików.
- Możliwość zastosowania wielokanałowego schematu generacji MC.
- Oszczędne wykorzystanie pamięci dla algorytmu kubicznego (do zapamiętywania wierzchołków każdej komórki używane są dwie 2-bajtowe liczby całkowite zamiast  $2n$  8-bajtowych liczb zmiennopozycyjnych).
- Program jest dostępny w dwóch językach programowania: C++ i Fortran 77.
- Tzw. wersja „kompakt” o nazwie mFOAM dostępna jest w systemie ROOT – szczegóły w: [S. Jadach, P. Sawicki, Comput. Phys. Commun. 177 \(2007\) 441; arXiv:physics/0506084.](#)



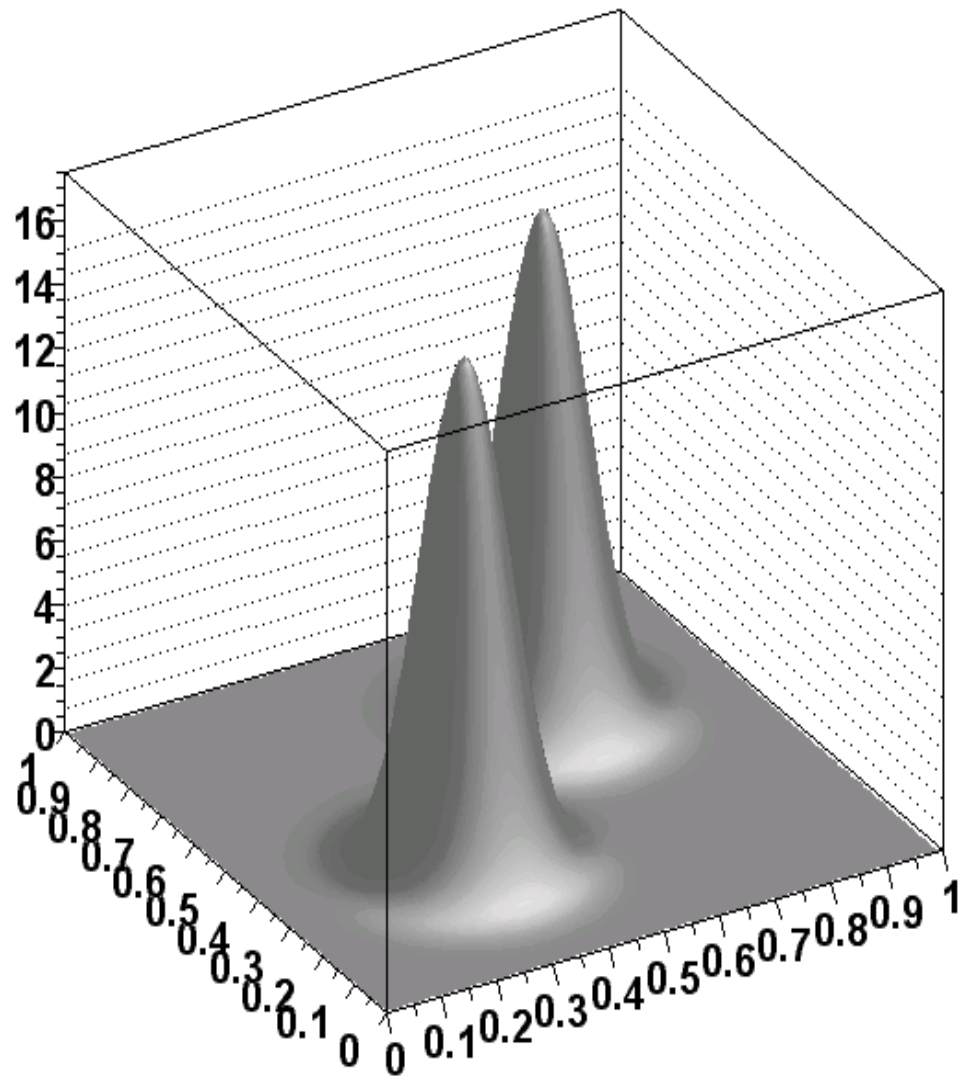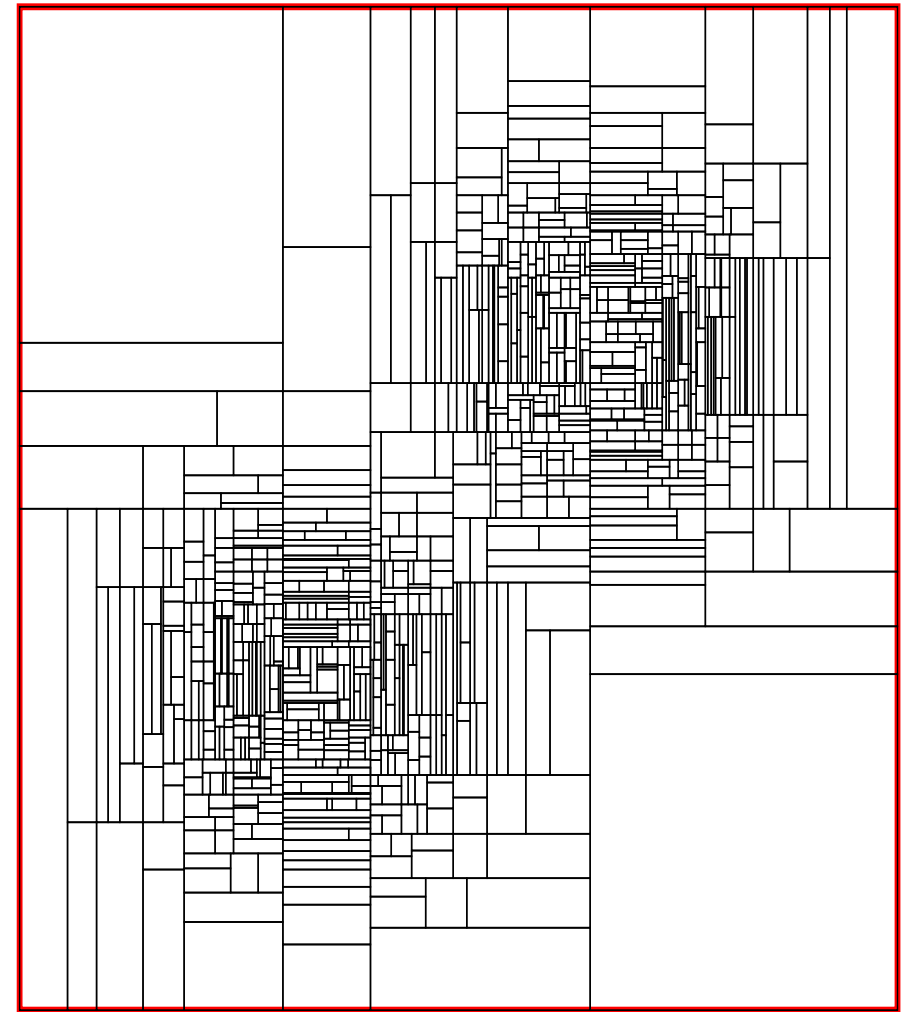

## Trzy testowe funkcje dwu i trzech zmiennych

Wydajności generowania przypadków:  $\langle w \rangle / w_{\max}^\varepsilon$  dla  $\varepsilon = 0.0005$  (tzn.  $\mathcal{P}(w > w_{\max}^\varepsilon) < \varepsilon$ ).

Wyniki FOAMa dla 5000 komórek i 200 przypadków MC na komórkę w fazie eksploracyjnej.

| Funkcja 2-wymiarowa                  | FOAM-symplektyczny | FOAM-kubiczny | VEGAS |
|--------------------------------------|--------------------|---------------|-------|
| $\rho_a(x)$ (cienka diagonalą)       | 0.93               | 0.86          | 0.03  |
| $\rho_b(x)$ (brzeg koła)             | 0.82               | 0.82          | 0.16  |
| $\rho_b(x)$ (brzeg kwadratu)         | 1.00               | 1.00          | 0.53  |
| Funkcja 3-wymiarowa                  | FOAM-symplektyczny | FOAM-kubiczny | VEGAS |
| $\rho_a(x)$ (cienka diagonalą)       | 0.74               | 0.66          | 0.002 |
| $\rho_b(x)$ (cienka sfera)           | 0.47               | 0.53          | 0.11  |
| $\rho_b(x)$ (powierzchnia sześcianu) | 0.95               | 1.00          | 0.30  |

⇒ **Ćw. N4.1:** Zastosować program mFOAM z systemu ROOT do obliczenia całek  $\Phi$  i  $\Psi$  z wykładu 2. Porównać efektywność tego algorytmu oraz klasycznych metod całkowania Monte Carlo.

- Wszystkie formuły kwadraturowe przeblizają wartość całki przez liniową kombinację wartości funkcji:

$$I_Q = \sum_{i=1}^m w_i f(x_i).$$

Różne metody odpowiadają różnym wyborom punktów (węzłów)  $x_i$  i wag  $w_i$ . Z reguły wycałkowują dokładnie wielomian pewnego stopnia (np. reguła trapezów wycałkowuje dokładnie wielomian 1-go stopnia, reguła Simpsona – wielomian 3-go stopnia itd.).

▷ Metoda podstawowa Monte Carlo może być uważana za formułę kwadraturową z jednostkowymi wagami i punktami wybieranymi równomiernie, ale losowo.

- Wydajności metod całkowania:

| Niepewność jako funkcja liczby punktów $n$ | 1 wymiar   | $d$ wymiarów             |
|--------------------------------------------|------------|--------------------------|
| Monte Carlo                                | $n^{-1/2}$ | $n^{-1/2}$               |
| Reguła trapezów                            | $n^{-2}$   | $n^{-2/d}$               |
| Reguła Simpsona                            | $n^{-4}$   | $n^{-4/d}$               |
| $m$ -punktowa reguła Gaussa                | $n^{-2m}$  | $n^{-2m/d} \ (m \leq n)$ |

## Wnioski:

- **W jednym wymiarze metoda MC jest znacznie wolniej zbieżna od kwadratur numerycznych** (nawet od najprostszej metody trapezów)!
- **W wielu wymiarach efektywność metody MC względem kwadratur poprawia się** (w tym sensie, że zbieżność metody MC jest taka sama, a zbieżność kwadratur pogarsza się).
  - ▷ Metoda MC jest **szybciej zbieżna** od:
    - reguły trapezów dla  $d > 4$ , reguły Simpsona dla  $d > 8$ ,
    - 3-punktowej reguły Gaussa dla  $d > 12$ , 10-punktowej reguły Gaussa dla  $d > 40$ .
  - Uwaga: Dla 10-punktowej reguły Gaussa w 40 wymiarach trzeba obliczyć  $10^{40}$  wartości funkcji – **praktycznie niemożliwe!**

## Wady kwadratur numerycznych:

- Trudne do zastosowania w wielu wymiarach ( $> 2$ ) – z reguły całkuje się niezależnie w każdym wymiarze. Brak kwadratur prawdziwie wielowymiarowych!
- Trudne do zastosowania dla skomplikowanych obszarów całkowania.
- Nie wszystkie funkcje dają się dobrze przybliżać wielomianami, np. funkcje nieciągłe, nieróżniczkowalne w punktach itd.
- Błędy całkowania są trudne do oszacowania!
